# Supplementary material for: Dynamic growth of rhombic dodecahedral Cu2O crystals controlled by reaction temperature and their size-dependent photocatalytic performance
Source: Royal Society of Chemistry journal article supplement (doi:10.1039/c9ra07255a), 2019-01-01
Supplement: c9ra07255a1.pdf [file c9ra07255a1.pdf]

1 **Dynamic Growth of Rhombic Dodecahedral Cu<sub>2</sub>O Crystals**  
2 **Controlled by Reaction Temperature and Their Size-dependent**  
3 **Photocatalytic Performances**

4 Xiaodong Yang,<sup>a</sup> Shupeng Zhang,<sup>a</sup> Lei Zhang,<sup>b</sup> Bo Zhang,<sup>\*b</sup> Tianrui Ren<sup>\*b</sup>

5 <sup>a</sup>State Key Laboratory Breeding Base of Green Pesticide and Agricultural  
6 Bioengineering/Key Laboratory of Green Pesticide and Agricultural Bioengineering,  
7 Ministry of Education, Guizhou University, Guiyang, 550025, P. R. China

8 <sup>b</sup>The Key Laboratory of Resource Chemistry of Ministry of Education, Shanghai  
9 Engineering Research Center of Green Energy Chemical Engineering, College of  
10 Chemistry and Materials Science, Shanghai Normal University, 100 Guilin Road,  
11 Shanghai, 200234, P. R. China

12 \* Corresponding author:

13 Prof. Tianrui Ren, E-mail address: trren@shnu.edu.cn.

14 Dr. Bo Zhang, E-mail address: zb830216@shnu.edu.cn

15

16

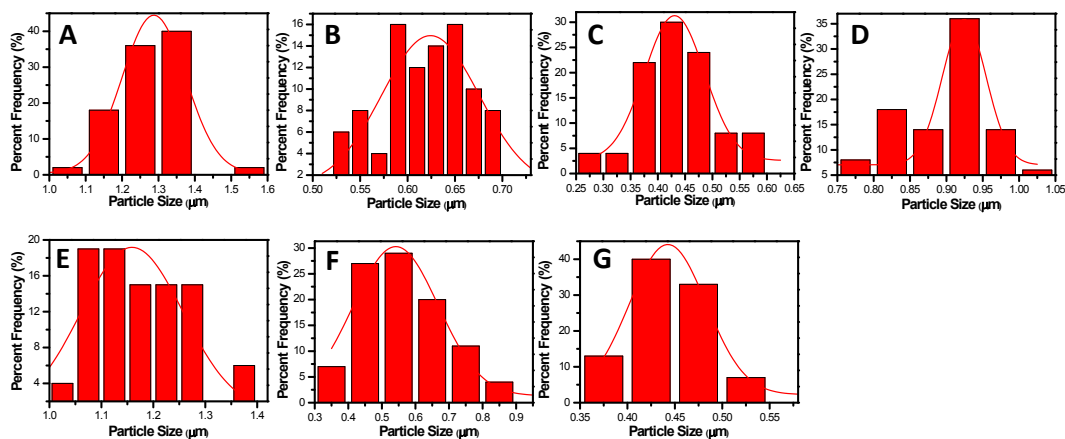

17

18 **Figure S1.** Size distribution of the Cu<sub>2</sub>O nanocrystals synthesized with various

19 temperatures: (a) TRD-40, (b) RD-50, (c) RD-60, (d) RD-70, (e) RD-80, (f) RD-90

20 and (g) RD-100.

21 **Table S1.** Average particle sizes and relative standard deviations of the as-obtained

22 Cu<sub>2</sub>O crystals.

| Sample | Average<br>Particle Size (μm) | Relative<br>Standard Deviation (%) |
|--------|-------------------------------|------------------------------------|
| TRD-40 | 1.29                          | 0.02                               |
| RD-50  | 0.62                          | 0.01                               |
| RD-60  | 0.43                          | 0.01                               |
| RD-70  | 0.92                          | 0.01                               |
| RD-80  | 1.16                          | 0.02                               |
| RD-90  | 0.54                          | 0.02                               |
| RD-100 | 0.44                          | 0.004                              |

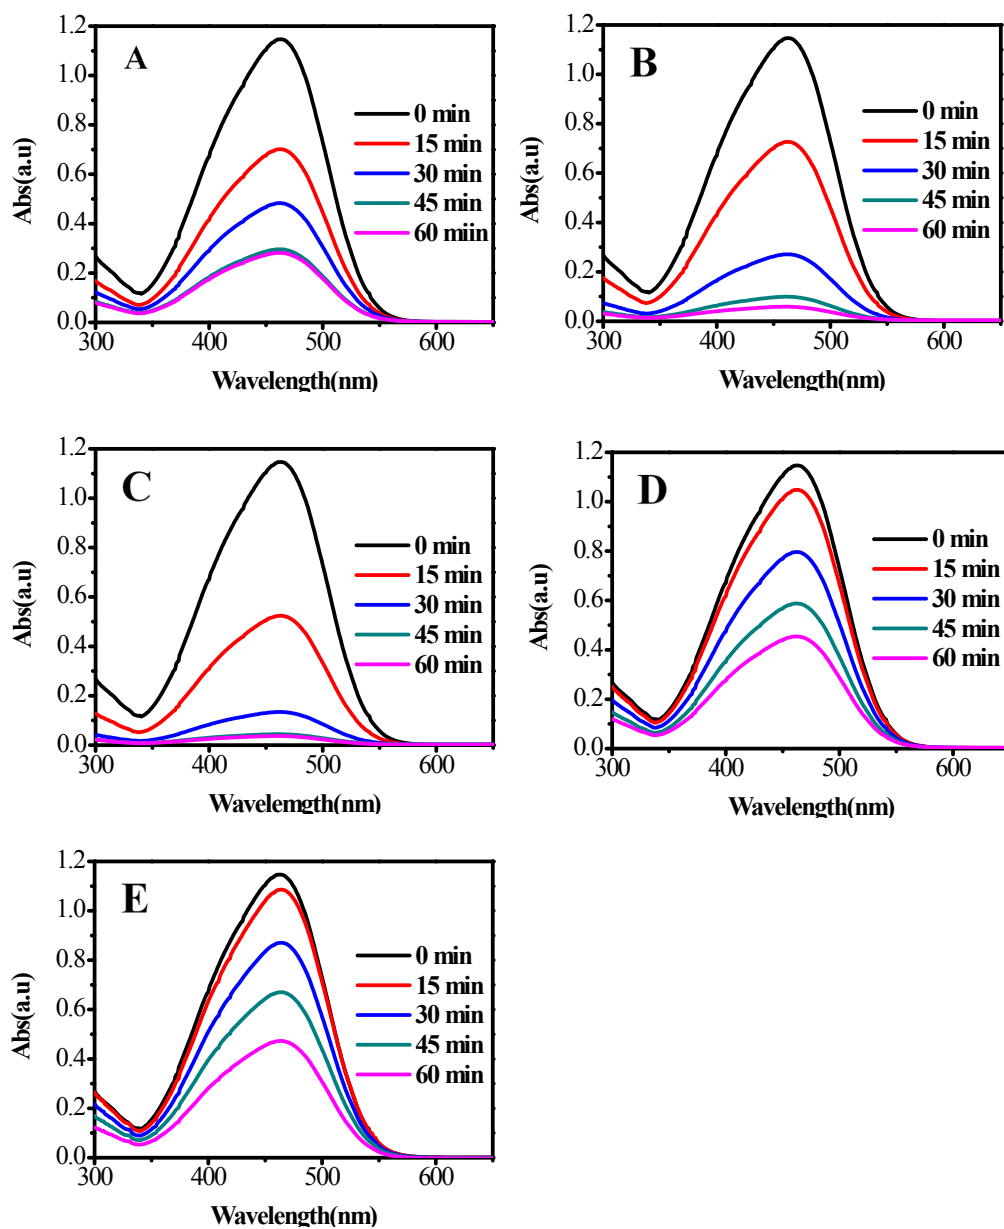

23

24 **Figure S2.** UV-vis absorption spectra of 15 mg/L MO solution as a function of  
 25 irradiation time using (A) **TRD-40**, (B) **RD-50**, (C) **RD-60**, (D) **RD-70** and (E) **RD-**  
 26 **80**.

27

28

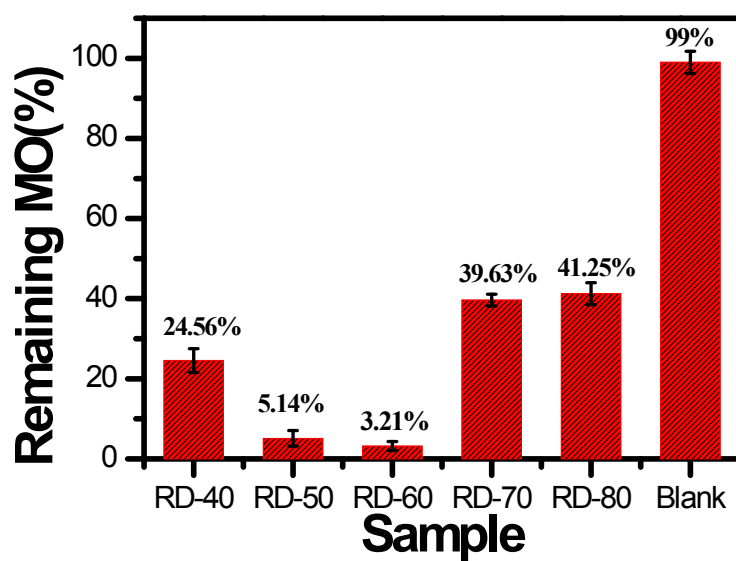

29

30 **Figure S3.** Remaining MO after photodegradation of MO by the obtained  $\text{Cu}_2\text{O}$   
 31 photocatalysts.

32

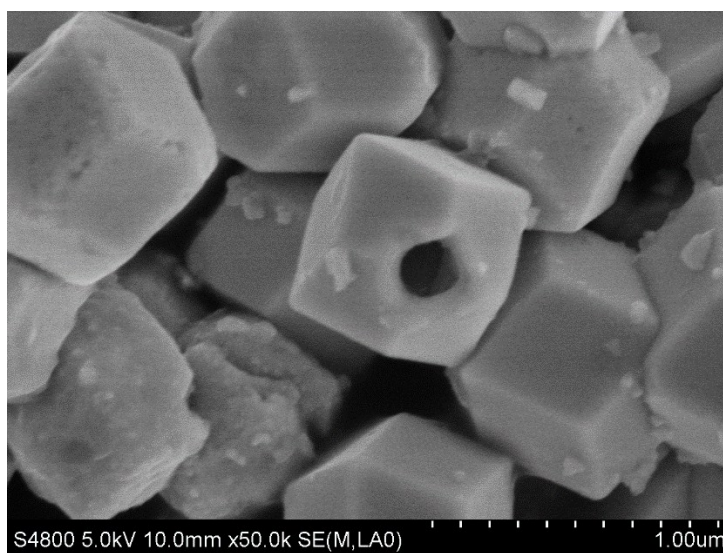

33

34 **Figure S4.** FESEM image of **RD-60**  $\text{Cu}_2\text{O}$  photocatalysts after five cycles of  
 35 photocatalytic reactions.

36
